# Supplementary material for: The Methionine 549 and Leucine 552 Residues of Friedelin Synthase from Maytenus ilicifolia Are Important for Substrate Binding Specificity
Source: MDPI journal article supplement (doi:10.3390/molecules26226806), 2021-11-11

The methionine 549 and leucine 552 residues of friedelin synthase from *Maytenus ilicifolia* are important for substrate binding specificity

Bruna F. Mazzeu<sup>1</sup>, Tatiana M. Souza-Moreira<sup>1</sup>, Andrew A. Oliveira<sup>2</sup>, Melissa Remlinger<sup>1</sup>, Lidiane G. Felipe<sup>1</sup>, Sandro R. Valentini<sup>3</sup>, Rafael V.C. Guido<sup>2</sup>, Cleslei F. Zanelli<sup>3</sup> and Maysa Furlan<sup>1\*</sup>

<sup>1</sup>*Instituto de Química, Univ. Estadual Paulista - UNESP,*

*CP 355, 14800-900 Araraquara, SP, Brazil.*

<sup>2</sup>*Centro de Pesquisa e Inovação em Biodiversidade e Fármacos, Instituto de Física de São Carlos, Universidade de São Paulo, São Carlos, SP 13563-120, Brazil.*

<sup>3</sup>*Faculdade de Ciências Farmacêuticas, Univ. Estadual Paulista-UNESP, Rod. Araraquara-Jaú km 1, Araraquara, SP 14801-902, Brazil*

\*Corresponding author. Tel: +55-16-3301-9661; fax: +55-16-3301-9692.

E-mail address: maysa.furlan@unesp.br (M. Furlan)

## Supplementary Material

**Figure S1:** Multiple global alignment in the wild MiFRS sequence. It is highlighted the mutated residues.

|        |     |              |     |             |
|--------|-----|--------------|-----|-------------|
| ScLAS  | 440 | KGAWCFSTKTQ  | 524 | PAEVFGNIMV  |
| 1W6K   | 439 | KGGFSTLDC    | 517 | PSEVFGDIMI  |
| SAD1   | 468 | KGSWTLSSVDN  | 547 | PSESERNIVV  |
| PEN5   | 471 | KGGWTFQDREQ  | 550 | PVEHVENTIV  |
| PEN6   | 476 | KGGWTFSDQDQ  | 555 | PVERMEDTIV  |
| PEN1   | 475 | KGGWTFSDKQDQ | 554 | PVEFVQDTVI  |
| PEN4   | 475 | KGGWTFSDQDQ  | 554 | PVEFLEDTIV  |
| MiCAS1 | 472 | KGAWTFSTADH  | 551 | PAETFGDIVI  |
| LcCAS1 | 475 | KGAWTFSTADH  | 554 | PAETFGDIVI  |
| BPX1   | 477 | KGAWTFSTADH  | 556 | PAETFGDIVI  |
| KdCAS  | 468 | KGAWTFSTADH  | 547 | PAETFGDIVI  |
| CAS1   | 467 | KGAWTFSTADH  | 546 | PAETFGDIVI  |
| PNX    | 467 | KGAWTFSTADH  | 546 | PAETFGDIVI  |
| PSX    | 467 | KGAWTFSTADH  | 546 | PAETFGDIVI  |
| OSC5   | 467 | KGAWTFSTADH  | 546 | PAETFGDIVI  |
| GgCAS1 | 467 | KGAWTFSTADH  | 546 | PAETFGDIVI  |
| BPW    | 466 | KGAWTFSMQDH  | 545 | PTEFFEDTLI  |
| OSC3   | 466 | KGAWTFSMHDH  | 545 | PTEFFREETLI |
| GgLUS1 | 466 | KGAWTFSMHDH  | 545 | PTEFFEDTMI  |
| OEW    | 467 | KGAWTFSMQDH  | 546 | PTEFFEDVLI  |
| TRW    | 469 | KGAWTFSLQDH  | 548 | PTEFFEDVLI  |
| PdFRS  | 466 | KGSWTFSDQDH  | 545 | PMEEFLENIVI |
| TwOSC1 | 472 | KGSWTFSDQDH  | 551 | PMEEFLENIVI |
| MiFRS  | 468 | KGSWTFSDQDH  | 548 | PMEEFLENIVI |
| TwOSC3 | 468 | KGSWTFSDQDH  | 548 | PMEEFLENIVI |
| OSC1   | 468 | KGAWTFSDRDH  | 547 | PVEFLEDIVI  |
| RsM2   | 471 | KGAWTFSSQDY  | 550 | PLEFFENIVV  |
| LcIMS1 | 466 | KGSWTFSDQDH  | 545 | PVEFLEDLII  |
| LUP1   | 467 | KGAWTFSDRDH  | 546 | PTEFFMANTMV |
| LUP2   | 470 | KGAWTFSDRDH  | 549 | PTDFFTCVMA  |
| RcLUS  | 468 | KGAWTFSDKQDQ | 547 | PVERMEDIVV  |
| BgLUS  | 468 | KGSWTFSDKQDH | 547 | PVEFLADIVI  |
| KcMS   | 468 | KGSWTFSDKQDH | 547 | PVEFLEDIVI  |
| SHS1   | 468 | KGSWTFSDQDH  | 547 | PVEFLEDIVI  |
| KdFRS  | 469 | KGAWTFSDQDH  | 548 | PTEFFENIVI  |
| KdLUS  | 469 | KGAWTFSDQDH  | 548 | PTEFFENIVI  |
| KdGLS  | 469 | KGSWTFSDQDH  | 548 | PTEFFENIVI  |
| PNY1   | 470 | KGSWTFSDQDH  | 549 | PTEFFADIVI  |
| PNY2   | 468 | KGSWTFSDQDH  | 547 | PTEFFEDIVI  |
| EtAS   | 469 | KGSWTFSDQDH  | 548 | PTEFFADIVI  |
| RsM1   | 469 | KGSWTFSDQDH  | 548 | PTEFFADIVI  |
| KdTAS  | 488 | KGSWTFSDQDH  | 567 | PTEFFADIVI  |
| BPY    | 469 | KGSWTFSDQDH  | 548 | STEFFADIVI  |
| TwOSC2 | 471 | KGSWTFSDQDH  | 550 | PTEFFADIVV  |
| PSM    | 469 | KGSWTFSDKQDH | 548 | PVEFLEEIVV  |
| AMY2   | 469 | KGAWTFSDQDH  | 548 | PTEFFEDIVI  |
| GgbAS1 | 469 | KGSWTFSDQDH  | 548 | PTEFFADIVV  |
| PSY    | 469 | KGSWTFSDQDH  | 548 | PTEFFADIVV  |
| AMY1   | 469 | KGSWTFSDQDH  | 548 | PTEFFADIVV  |

**Table S1:** Sequences of the oxidosqualene cyclase enzymes used in multiple alignment with their accession number on GenBank, species and function.

| Accession number  | Species                         | Function                                       |
|-------------------|---------------------------------|------------------------------------------------|
| AB257562.1        | <i>Arabidopsis thaliana</i>     | Arabidiol synthase (PEN1)                      |
| AY327541.1        | <i>Arabidopsis thaliana</i>     | Talianol synthase (PEN4)                       |
| BT020456.1        | <i>Arabidopsis thaliana</i>     | Marneral synthase (PEN5)                       |
| AB274959.1        | <i>Arabidopsis thaliana</i>     | Triterpene synthase multifuncional (PEN6)      |
| NM_179572.1       | <i>Arabidopsis thaliana</i>     | Lupeol synthase 1 (LUP1)                       |
| NM_106545.3       | <i>Arabidopsis thaliana</i>     | Lupeol synthase 2 (LUP2)                       |
| NM_126681.2       | <i>Arabidopsis thaliana</i>     | Cycloartenol synthase (CAS1)                   |
| AB263204.1        | <i>Rhizophora stylosa</i>       | Triterpene synthase multifuncional (RsM2)      |
| AB289586.1        | <i>Bruguiera gymnorhiza</i>     | Lupeol synthase (BgLUS)                        |
| AB257507.1        | <i>Kandelia candel</i>          | Triterpene synthase multifuncional (KcMS)      |
| DQ268869.1        | <i>Ricinus communis</i>         | Lupeol synthase (RcLUS)                        |
| AB058643.1        | <i>Luffa cylindrica</i>         | Isomultiflorenol synthase (LcIMS1)             |
| <u>AB037203.1</u> | <i>Glycyrrhiza glabra</i>       | $\beta$ -amyrin synthase (GgbAS1)              |
| AB181244.1        | <i>Lotus japonicus</i>          | $\beta$ - amyrin synthase (OSC1)               |
| AB034802.1        | <i>Pisum sativum</i>            | $\beta$ - amyrin synthase (PSY)                |
| AF478453.1        | <i>Medicago truncatula</i>      | $\beta$ -amyrin synthase (AMY1)                |
| AF478455.1        | <i>Lotus japonicus</i>          | $\beta$ -amyrin synthase multifuncional (AMY2) |
| AB034803.2        | <i>Pisum sativum</i>            | amyrin synthase mista (PSM)                    |
| AB009030.1        | <i>Panax ginseng</i>            | $\beta$ -amyrin synthase (PNY1)                |
| AB014057.1        | <i>Panax ginseng</i>            | $\beta$ -amyrin synthase (PNY2)                |
| AB055512.1        | <i>Betula platyphylla</i>       | $\beta$ -amyrin synthase (BPY)                 |
| HM623868.1        | <i>Kalanchoe daigremontiana</i> | Taraxerol synthase (KdTAS)                     |
| AB263203.1        | <i>Rhizophora stylosa</i>       | Triterpene synthase multifuncional (RsM1)      |
| AB206469.1        | <i>Medicago tirucalli</i>       | $\beta$ -amyrin synthase (EtAS)                |
| HM623870.1        | <i>Kalanchoe daigremontiana</i> | Friedelin synthase (KdFRS)                     |
| HM623869.1        | <i>Kalanchoe daigremontiana</i> | Glutanol synthase (KdGLS)                      |
| HM623871.1        | <i>Kalanchoe daigremontiana</i> | Lupeol synthase (KdLUS)                        |
| AB025343.1        | <i>Olea europaea</i>            | Lupeol synthase (OEW)                          |
| AB025345.1        | <i>Taraxacum officinale</i>     | Lupeol synthase (TRW)                          |
| AB181245.1        | <i>Lotus japonicus</i>          | Lupeol synthase (OSC3)                         |
| AB116228.1        | <i>Glycyrrhiza glabra</i>       | Lupeol synthase (GgLUS1)                       |
| AB055511.1        | <i>Betula platyphylla</i>       | Lupeol synthase (BPW)                          |
| AB181246.1        | <i>Lotus japonicus</i>          | Cycloartenol synthase (OSC5)                   |
| AB025968.1        | <i>Glycyrrhiza glabra</i>       | Cycloartenol synthase (GgCAS1)                 |
| AB009029.1        | <i>Panax ginseng</i>            | Cycloartenol synthase (PNX)                    |
| HM623872.1        | <i>Kalanchoe daigremontiana</i> | Cycloartenol synthase (KdCAS)                  |
| AB055509.1        | <i>Betula platyphylla</i>       | Cycloartenol synthase (BPX1)                   |
| APG38073.1        | <i>Maytenus ilicifolia</i>      | Friedelin synthase (MiFRS)                     |
| AAA16975.1        | <i>Saccharomyces cerevisiae</i> | Lanosterol synthase (ScLAS)                    |
| P48449.1          | <i>Homo sapiens</i>             | Lanosterol synthase (1W6K)                     |
| BAK52535.1        | <i>Aster tataricus</i>          | Shionone synthase (SHS1)                       |
| AJ311789.1        | <i>Avena strigosa</i>           | $\beta$ -amyrin sintase (SAD1)                 |

|            |                               |                                   |
|------------|-------------------------------|-----------------------------------|
| ART66198.1 | <i>Populus davidiana</i>      | Friedelin synthase (PdFRS)        |
| AWK97810.1 | <i>Tripterygium wilfordii</i> | Friedelin synthase (TwOSC1)       |
| AWK97811.1 | <i>Tripterygium wilfordii</i> | $\beta$ -amyrin synthase (TwOSC2) |
| AWK97812.1 | <i>Tripterygium wilfordii</i> | Friedelin synthase (TwOSC3)       |

**Table S2** - List of forward and reverse primers for each site-directed mutation reaction.

| <i>Primer</i>              | <i>Sequence 5'-3'</i>                             | <i>Tm (° C)</i> |
|----------------------------|---------------------------------------------------|-----------------|
| <b>F473Wf</b><br>(VZO2355) | CAAGGGTAGTTGGACAT <u>G</u> GTCCGATCAAGACCACGG     | 67,1            |
| <b>F473Wr</b><br>(VZO2356) | CCGTGGTCTTGATCGGAC <u>C</u> ATGTCCAACCTACCTTG     | 67,1            |
| <b>M549Sf</b><br>(VZO2361) | GATGGAAATGTTGAACCCAT <u>C</u> TGAATTCTTGAAAACATCG | 62,8            |
| <b>M549Sr</b><br>(VZO2362) | CGATGTTTTCCAAGAATTCAGATGGGTTCAACATTCCATC          | 62,8            |
| <b>L552Fr</b><br>(VZO2364) | GATGACGATGTTTTCA <u>A</u> AGAATTCATTGGG           | 58,5            |

The underlined region indicates the bases of the respective amino acid residue mutated.  
The letters *f* and *r* in the primers correspond to forward and reverse, respectively.

**Table S3** - List of forward primers used in sequencing for each site-directed mutation reaction.

| <i>Primer</i>                  | <i>Sequence 5'-3'</i>  | <i>Verified mutations</i> |
|--------------------------------|------------------------|---------------------------|
| <b>369/484seq</b><br>(VZO2372) | GGGACTCTTTGTATGTTGCATC | F473W                     |
| <b>534/612seq</b><br>(VZO2373) | GTTGCTTGTTAGCTGCAACC   | M549S, L552               |

**Figure S2:** Interaction between Phe473 residue and Trp612 residue.

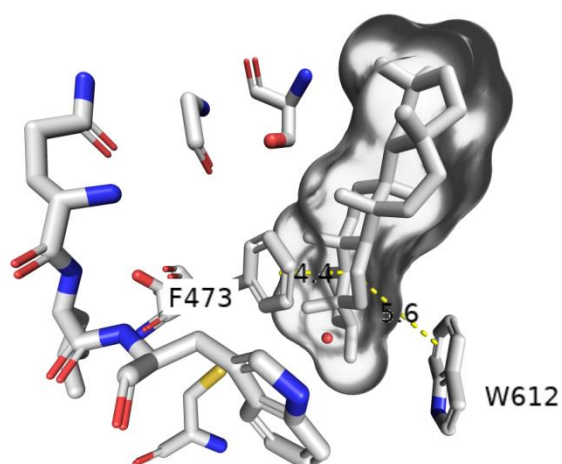

**Table S4:** Concentration of friedelin present in fractions extracted from *S. cerevisiae* yeast, expressing *MiFRS* mutants.

| Sample             | Friedelin peak<br>area average<br>$t_R \sim 21,100$ min | Cholesterol peak<br>area average<br>$t_R \sim 14,706$ min | Friedelin area/<br>Cholesterol area | [friedelin]<br>(mg/L)* |
|--------------------|---------------------------------------------------------|-----------------------------------------------------------|-------------------------------------|------------------------|
| <i>MiFRS</i> – Hex | 897656,7                                                | 3948327                                                   | 0,227351                            | 0,206±0,002            |
| M549S - Hex        | 5548441                                                 | 2112643                                                   | 2,626303                            | 0,403±0,002            |
| L552F - Hex        | 268982,7                                                | 4824556                                                   | 0,055753                            | 0,192±0,001            |

\* Concentration of friedelin in mg/L of culture medium.

**Figure S3:** Chromatogram of substances used as standard: (a) friedelin, (b)  $\beta$ -amyrin and  $\alpha$ - amyrin. Chromatogram of the hexane fractions of *MiFRS* (c), F473W (d), L552F (e) and M549S (f).

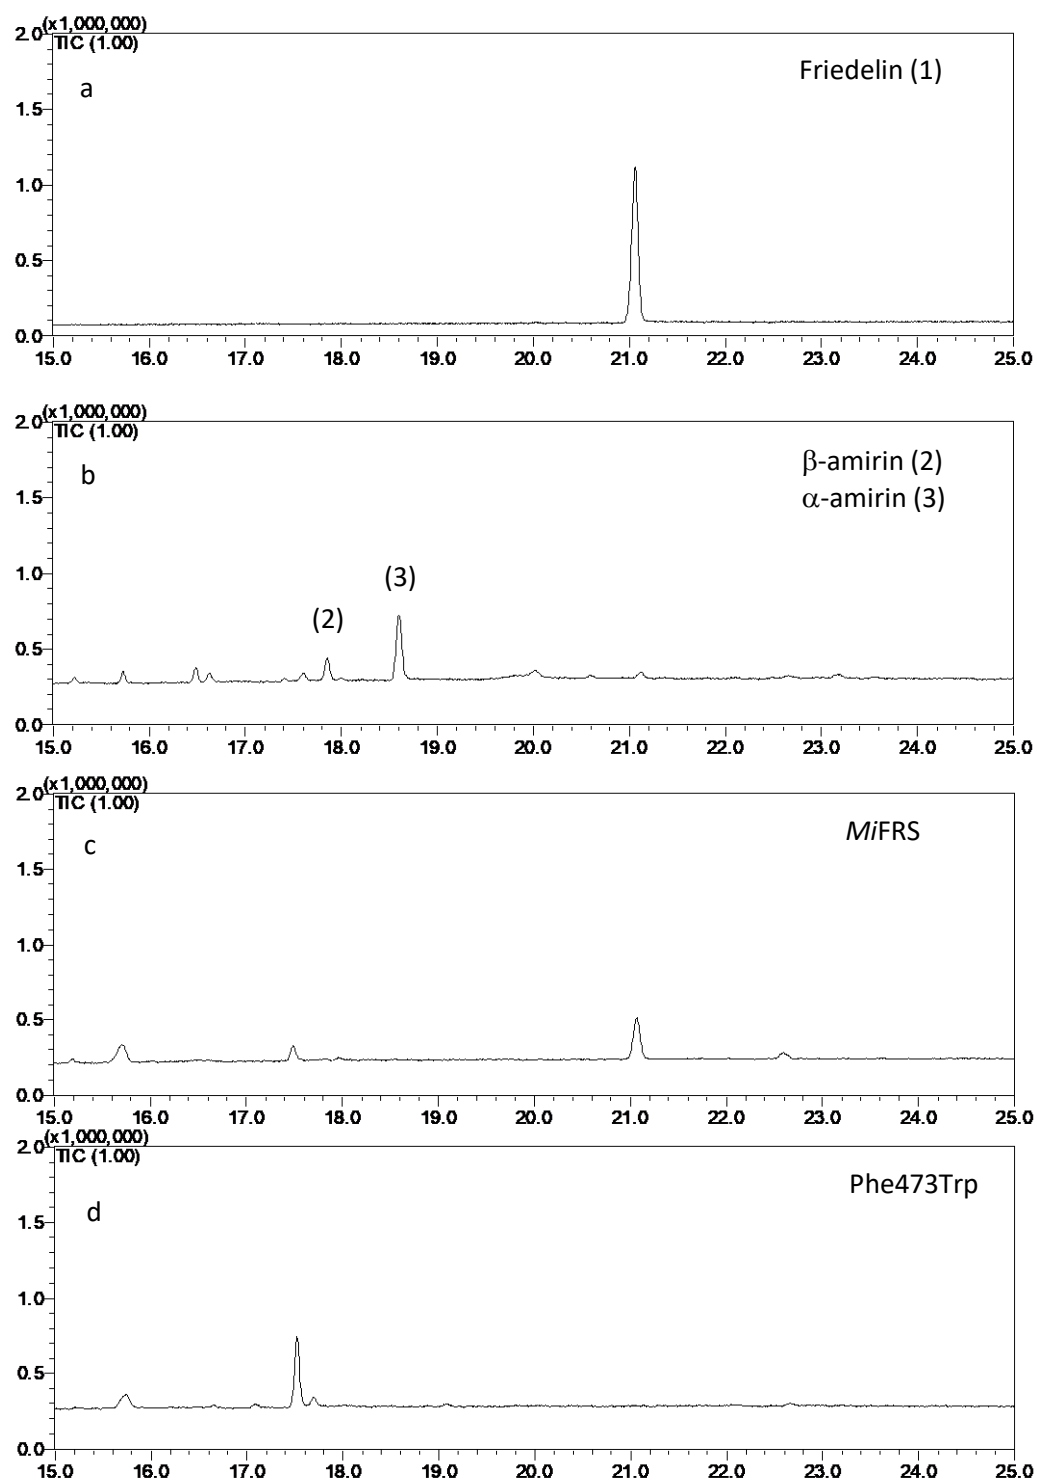

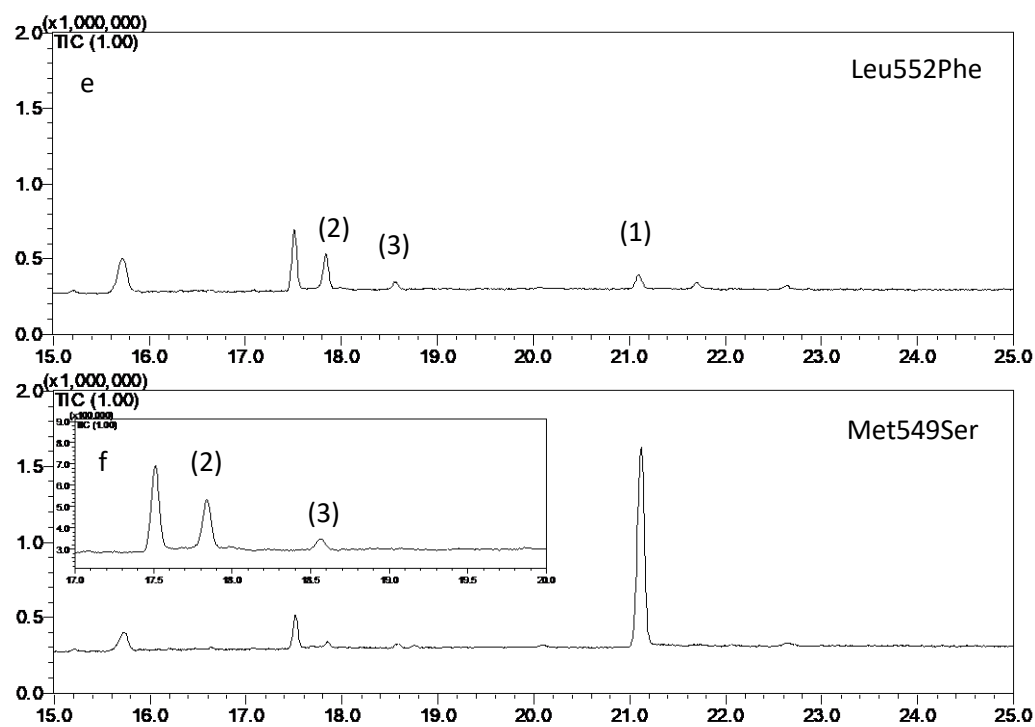

**Figure S4:** Chromatogram of the hexane fractions of wild type of MiFRS: (a) squalene, (b) oxidosqualene, (c) cholesterol and (d) friedelin.

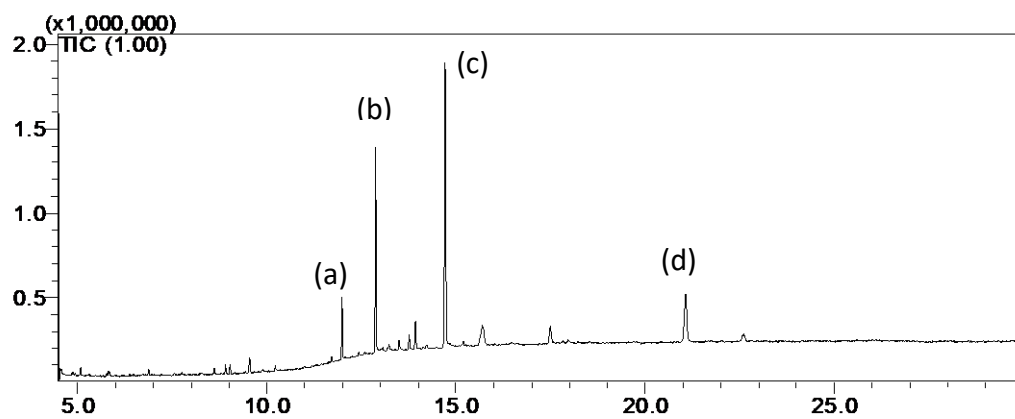

Supplement: s1 [file s1]
